# Supplementary material
Source: PubMed Central journal article supplement (PMC3233793)
Supplement: supp_00460.2010_figS9.pdf [file supp_00460.2010_figS9.pdf]

## Number of Cells Observed

| Day 10          | <b>-48/80</b>                   |                                 | Day 10                          |         | <b>+48/80</b>                   |  |
|-----------------|---------------------------------|---------------------------------|---------------------------------|---------|---------------------------------|--|
|                 | <u>&lt; 5 <math>\mu</math>m</u> | <u>&gt; 5 <math>\mu</math>m</u> | <u>&lt; 5 <math>\mu</math>m</u> |         | <u>&gt; 5 <math>\mu</math>m</u> |  |
| 3.27 $\pm$ 1.72 | HCC ASC                         | 9.88 $\pm$ 1.08                 | 0.96 $\pm$ 0.07                 | HCC ASC | 3.13 $\pm$ 0.43                 |  |
| 2.65 $\pm$ 0.18 | NCC ASC                         | 8.12 $\pm$ 0.78                 | 2.93 $\pm$ 0.61                 | NCC ASC | 5.63 $\pm$ 0.98                 |  |
| 1.79 $\pm$ 0.64 | BMSC                            | 7.07 $\pm$ 1.85                 | 3.50 $\pm$ 1.13                 | BMSC    | 8.07 $\pm$ 2.04                 |  |

| Day 30          | <b>-48/80</b>                   |                                 | Day 30                          |         | <b>+48/80</b>                   |  |
|-----------------|---------------------------------|---------------------------------|---------------------------------|---------|---------------------------------|--|
|                 | <u>&lt; 5 <math>\mu</math>m</u> | <u>&gt; 5 <math>\mu</math>m</u> | <u>&lt; 5 <math>\mu</math>m</u> |         | <u>&gt; 5 <math>\mu</math>m</u> |  |
| 0.76 $\pm$ 0.34 | HCC ASC                         | 2.98 $\pm$ 0.72                 | 0.42 $\pm$ 0.17                 | HCC ASC | 2.62 $\pm$ 0.94                 |  |
| 1.34 $\pm$ 0.28 | NCC ASC                         | 7.60 $\pm$ 0.98                 | 0.66 $\pm$ 0.18                 | NCC ASC | 1.29 $\pm$ 0.39                 |  |
| 1.02 $\pm$ 0.22 | BMSC                            | 3.49 $\pm$ 0.63                 | 1.91 $\pm$ 0.23                 | BMSC    | 4.12 $\pm$ 0.91                 |  |

| Day 60          | <b>-48/80</b>                   |                                 | Day 60                          |         | <b>+48/80</b>                   |  |
|-----------------|---------------------------------|---------------------------------|---------------------------------|---------|---------------------------------|--|
|                 | <u>&lt; 5 <math>\mu</math>m</u> | <u>&gt; 5 <math>\mu</math>m</u> | <u>&lt; 5 <math>\mu</math>m</u> |         | <u>&gt; 5 <math>\mu</math>m</u> |  |
| 1.27 $\pm$ 0.53 | HCC ASC                         | 3.67 $\pm$ 0.61                 | 5.65 $\pm$ 1.47                 | HCC ASC | 4.77 $\pm$ 0.90                 |  |
| 2.04 $\pm$ 0.28 | NCC ASC                         | 5.38 $\pm$ 1.02                 | 0.02 $\pm$ 0.02                 | NCC ASC | 5.01 $\pm$ 0.62                 |  |
| 0.81 $\pm$ 0.22 | BMSC                            | 5.78 $\pm$ 1.31                 | 2.45 $\pm$ 0.35                 | BMSC    | 2.89 $\pm$ 0.44                 |  |

## Cells Expressing PDGF $\beta$ R

| Day 10          | <b>-48/80</b>                   |                                 | Day 10                          |         | <b>+48/80</b>                   |  |
|-----------------|---------------------------------|---------------------------------|---------------------------------|---------|---------------------------------|--|
|                 | <u>&lt; 5 <math>\mu</math>m</u> | <u>&gt; 5 <math>\mu</math>m</u> | <u>&lt; 5 <math>\mu</math>m</u> |         | <u>&gt; 5 <math>\mu</math>m</u> |  |
| 0.00 $\pm$ 0.00 | HCC ASC                         | 0.28 $\pm$ 0.19                 | 0.01 $\pm$ 0.01                 | HCC ASC | 0.00 $\pm$ 0.00                 |  |
| 0.00 $\pm$ 0.00 | NCC ASC                         | 0.44 $\pm$ 0.20                 | 0.04 $\pm$ 0.02                 | NCC ASC | 0.13 $\pm$ 0.10                 |  |
| 0.00 $\pm$ 0.00 | BMSC                            | 0.25 $\pm$ 0.22                 | 0.03 $\pm$ 0.02                 | BMSC    | 0.35 $\pm$ 0.26                 |  |

| Day 30          | <b>-48/80</b>                   |                                 | Day 30                          |         | <b>+48/80</b>                   |  |
|-----------------|---------------------------------|---------------------------------|---------------------------------|---------|---------------------------------|--|
|                 | <u>&lt; 5 <math>\mu</math>m</u> | <u>&gt; 5 <math>\mu</math>m</u> | <u>&lt; 5 <math>\mu</math>m</u> |         | <u>&gt; 5 <math>\mu</math>m</u> |  |
| 0.00 $\pm$ 0.00 | HCC ASC                         | 0.08 $\pm$ 0.08                 | 0.00 $\pm$ 0.00                 | HCC ASC | 0.07 $\pm$ 0.07                 |  |
| 0.02 $\pm$ 0.02 | NCC ASC                         | 0.23 $\pm$ 0.13                 | 0.02 $\pm$ 0.02                 | NCC ASC | 0.17 $\pm$ 0.14                 |  |
| 0.01 $\pm$ 0.01 | BMSC                            | 0.04 $\pm$ 0.05                 | 0.18 $\pm$ 0.06                 | BMSC    | 2.17 $\pm$ 1.53                 |  |

| Day 60          | <b>-48/80</b>                   |                                 | Day 60                          |         | <b>+48/80</b>                   |  |
|-----------------|---------------------------------|---------------------------------|---------------------------------|---------|---------------------------------|--|
|                 | <u>&lt; 5 <math>\mu</math>m</u> | <u>&gt; 5 <math>\mu</math>m</u> | <u>&lt; 5 <math>\mu</math>m</u> |         | <u>&gt; 5 <math>\mu</math>m</u> |  |
| 0.00 $\pm$ 0.00 | HCC ASC                         | 0.16 $\pm$ 0.11                 | 0.63 $\pm$ 0.20                 | HCC ASC | 1.17 $\pm$ 0.34                 |  |
| 0.09 $\pm$ 0.07 | NCC ASC                         | 0.07 $\pm$ 0.05                 | 0.49 $\pm$ 0.18                 | NCC ASC | 1.36 $\pm$ 0.64                 |  |
| 0.00 $\pm$ 0.00 | BMSC                            | 0.52 $\pm$ 0.32                 | 0.07 $\pm$ 0.11                 | BMSC    | 0.56 $\pm$ 0.25                 |  |

## Cells Expressing NG2

| Day 10          | <b>-48/80</b>                   |                                 | Day 10                          |         | <b>+48/80</b>                   |  |
|-----------------|---------------------------------|---------------------------------|---------------------------------|---------|---------------------------------|--|
|                 | <u>&lt; 5 <math>\mu</math>m</u> | <u>&gt; 5 <math>\mu</math>m</u> | <u>&lt; 5 <math>\mu</math>m</u> |         | <u>&gt; 5 <math>\mu</math>m</u> |  |
| 0.00 $\pm$ 0.00 | HCC ASC                         | 0.42 $\pm$ 0.26                 | 0.01 $\pm$ 0.01                 | HCC ASC | 0.04 $\pm$ 0.04                 |  |
| 0.01 $\pm$ 0.01 | NCC ASC                         | 0.11 $\pm$ 0.07                 | 0.06 $\pm$ 0.05                 | NCC ASC | 0.05 $\pm$ 0.05                 |  |
| 0.01 $\pm$ 0.01 | BMSC                            | 0.48 $\pm$ 0.55                 | 0.03 $\pm$ 0.02                 | BMSC    | 0.45 $\pm$ 0.26                 |  |

| Day 30          | <b>-48/80</b>                   |                                 | Day 30                          |         | <b>+48/80</b>                   |  |
|-----------------|---------------------------------|---------------------------------|---------------------------------|---------|---------------------------------|--|
|                 | <u>&lt; 5 <math>\mu</math>m</u> | <u>&gt; 5 <math>\mu</math>m</u> | <u>&lt; 5 <math>\mu</math>m</u> |         | <u>&gt; 5 <math>\mu</math>m</u> |  |
| 0.00 $\pm$ 0.00 | HCC ASC                         | 0.19 $\pm$ 0.11                 | 0.05 $\pm$ 0.02                 | HCC ASC | 0.37 $\pm$ 0.29                 |  |
| 0.00 $\pm$ 0.00 | NCC ASC                         | 0.24 $\pm$ 0.14                 | 0.14 $\pm$ 0.07                 | NCC ASC | 0.08 $\pm$ 0.08                 |  |
| 0.03 $\pm$ 0.02 | BMSC                            | 0.33 $\pm$ 0.16                 | 0.26 $\pm$ 0.06                 | BMSC    | 0.47 $\pm$ 0.19                 |  |

| Day 60          | <b>-48/80</b>                   |                                 | Day 60                          |         | <b>+48/80</b>                   |  |
|-----------------|---------------------------------|---------------------------------|---------------------------------|---------|---------------------------------|--|
|                 | <u>&lt; 5 <math>\mu</math>m</u> | <u>&gt; 5 <math>\mu</math>m</u> | <u>&lt; 5 <math>\mu</math>m</u> |         | <u>&gt; 5 <math>\mu</math>m</u> |  |
| 0.05 $\pm$ 0.05 | HCC ASC                         | 0.42 $\pm$ 0.26                 | 0.87 $\pm$ 0.32                 | HCC ASC | 0.83 $\pm$ 0.30                 |  |
| 0.00 $\pm$ 0.00 | NCC ASC                         | 0.15 $\pm$ 0.08                 | 0.31 $\pm$ 0.12                 | NCC ASC | 1.31 $\pm$ 0.46                 |  |
| 0.04 $\pm$ 0.03 | BMSC                            | 0.30 $\pm$ 0.18                 | 0.47 $\pm$ 0.11                 | BMSC    | 1.55 $\pm$ 0.88                 |  |

## Cells Expressing SMA

| Day 10          | <b>-48/80</b>                   |                                 | Day 10                          |         | <b>+48/80</b>                   |  |
|-----------------|---------------------------------|---------------------------------|---------------------------------|---------|---------------------------------|--|
|                 | <u>&lt; 5 <math>\mu</math>m</u> | <u>&gt; 5 <math>\mu</math>m</u> | <u>&lt; 5 <math>\mu</math>m</u> |         | <u>&gt; 5 <math>\mu</math>m</u> |  |
| 0.00 $\pm$ 0.00 | HCC ASC                         | 0.44 $\pm$ 0.23                 | 0.02 $\pm$ 0.01                 | HCC ASC | 1.17 $\pm$ 0.50                 |  |
| 0.07 $\pm$ 0.05 | NCC ASC                         | 1.09 $\pm$ 0.32                 | 0.13 $\pm$ 0.09                 | NCC ASC | 0.70 $\pm$ 0.28                 |  |
| 0.22 $\pm$ 0.05 | BMSC                            | 1.25 $\pm$ 0.51                 | 0.46 $\pm$ 0.08                 | BMSC    | 3.08 $\pm$ 1.69                 |  |

| Day 30          | <b>-48/80</b>                   |                                 | Day 30                          |         | <b>+48/80</b>                   |  |
|-----------------|---------------------------------|---------------------------------|---------------------------------|---------|---------------------------------|--|
|                 | <u>&lt; 5 <math>\mu</math>m</u> | <u>&gt; 5 <math>\mu</math>m</u> | <u>&lt; 5 <math>\mu</math>m</u> |         | <u>&gt; 5 <math>\mu</math>m</u> |  |
| 0.04 $\pm$ 0.02 | HCC ASC                         | 0.33 $\pm$ 0.32                 | 0.00 $\pm$ 0.00                 | HCC ASC | 0.59 $\pm$ 0.21                 |  |
| 0.07 $\pm$ 0.05 | NCC ASC                         | 1.00 $\pm$ 0.38                 | 0.07 $\pm$ 0.06                 | NCC ASC | 0.00 $\pm$ 0.00                 |  |
| 0.08 $\pm$ 0.03 | BMSC                            | 0.33 $\pm$ 0.22                 | 0.39 $\pm$ 0.11                 | BMSC    | 0.56 $\pm$ 0.20                 |  |

| Day 60          | <b>-48/80</b>                   |                                 | Day 60                          |         | <b>+48/80</b>                   |  |
|-----------------|---------------------------------|---------------------------------|---------------------------------|---------|---------------------------------|--|
|                 | <u>&lt; 5 <math>\mu</math>m</u> | <u>&gt; 5 <math>\mu</math>m</u> | <u>&lt; 5 <math>\mu</math>m</u> |         | <u>&gt; 5 <math>\mu</math>m</u> |  |
| 0.06 $\pm$ 0.03 | HCC ASC                         | 0.56 $\pm$ 0.23                 | 1.37 $\pm$ 0.33                 | HCC ASC | 2.38 $\pm$ 0.69                 |  |
| 0.06 $\pm$ 0.04 | NCC ASC                         | 0.11 $\pm$ 0.07                 | 1.11 $\pm$ 0.25                 | NCC ASC | 3.67 $\pm$ 0.81                 |  |
| 0.11 $\pm$ 0.03 | BMSC                            | 1.13 $\pm$ 0.42                 | 0.53 $\pm$ 0.13                 | BMSC    | 1.38 $\pm$ 0.42                 |  |
