# Supplementary material
Source: PubMed Central journal article supplement (PMC3233793)

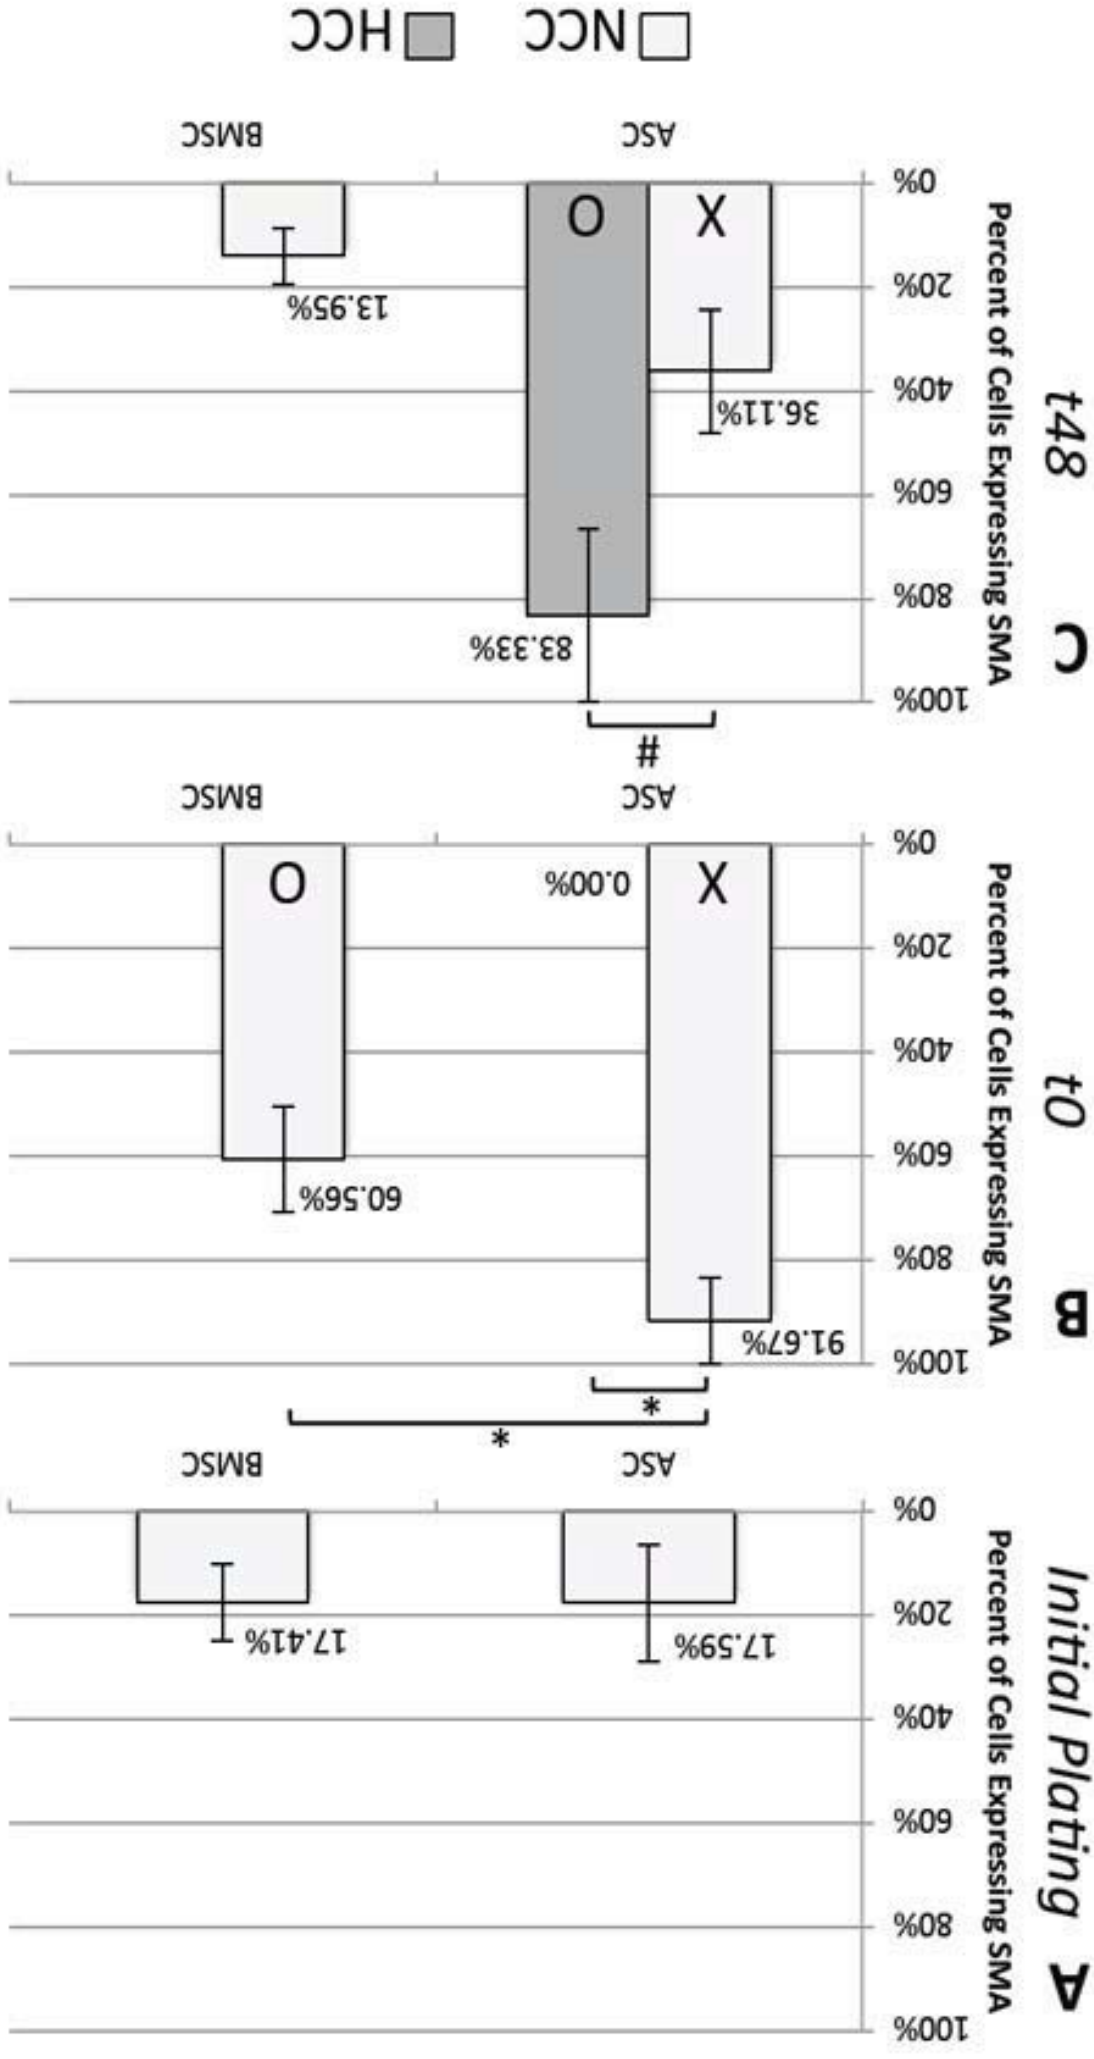

Supplement: supp_00460.2010_figS3.pdf [file supp_00460.2010_figS3.pdf]

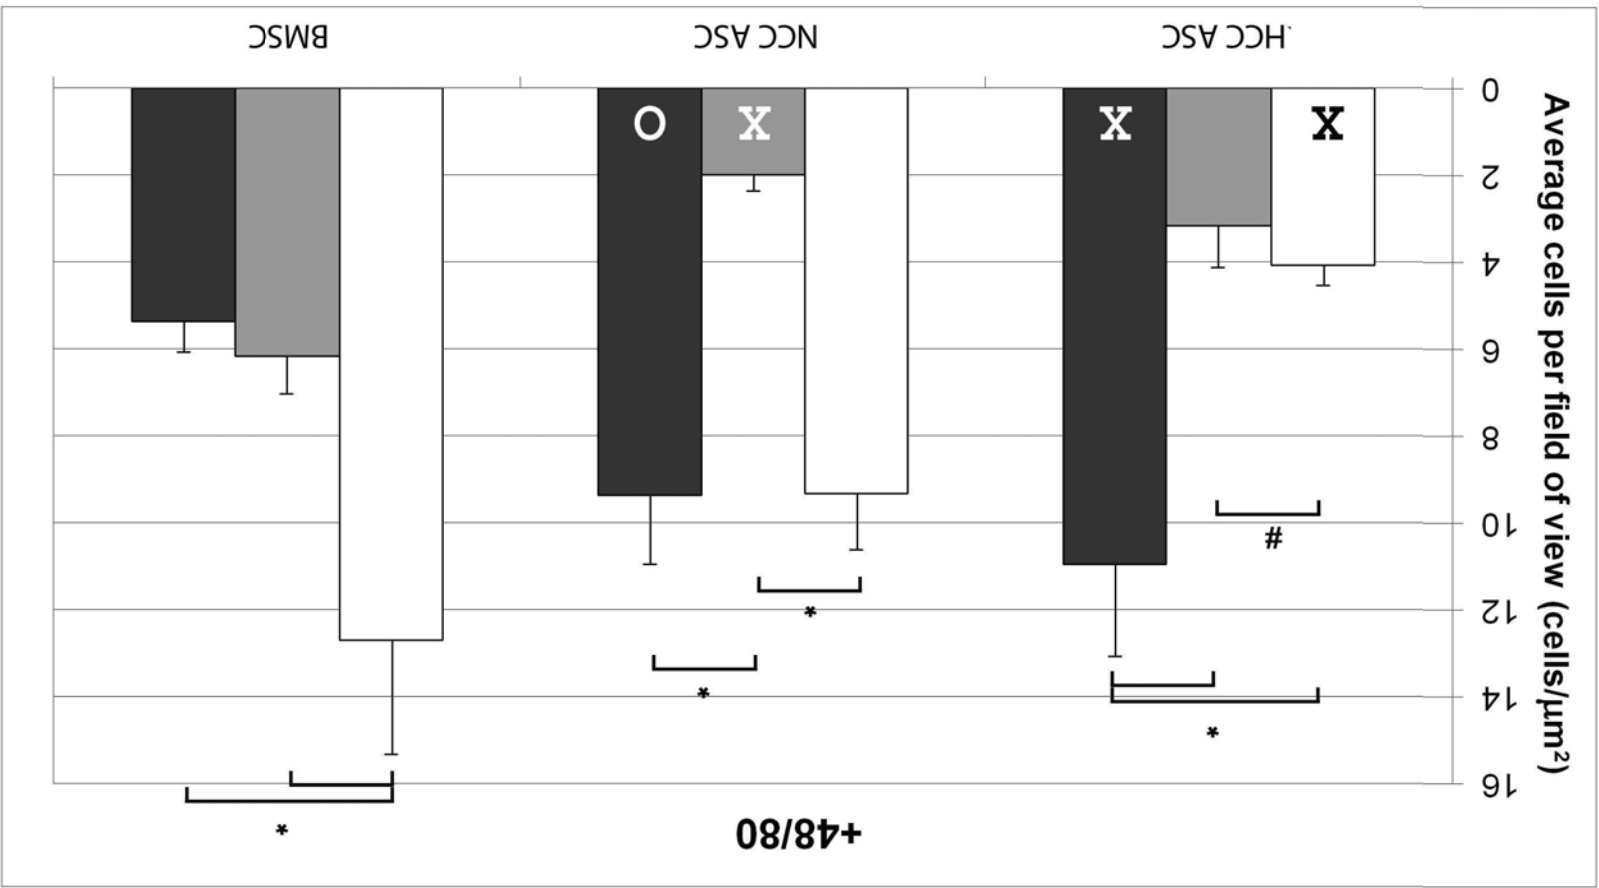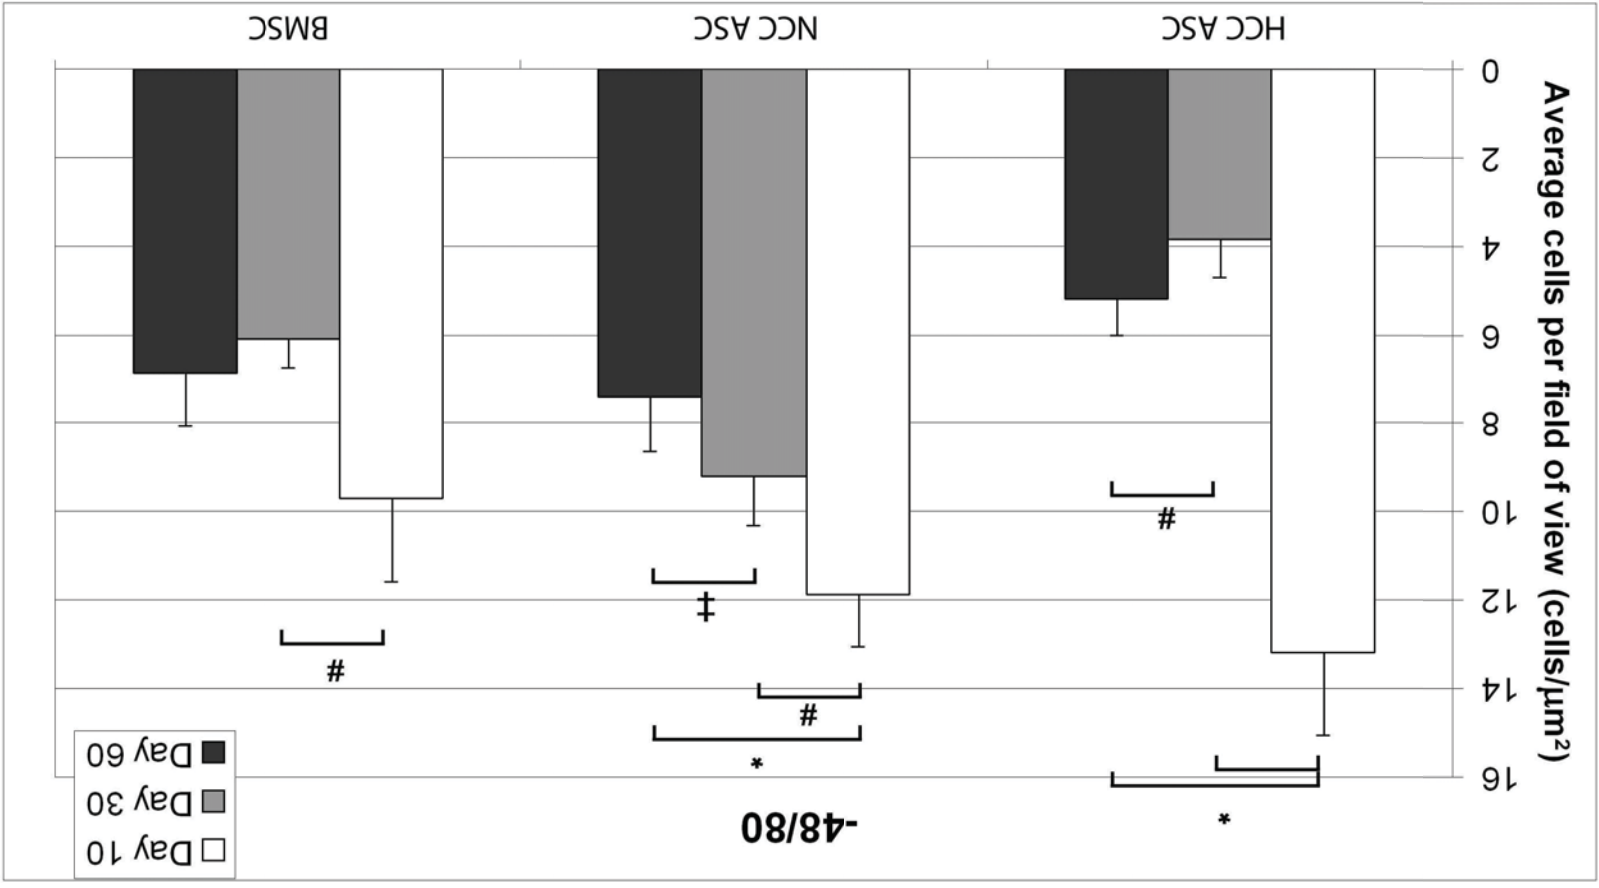

Supplement: supp_00460.2010_figS5.pdf [file supp_00460.2010_figS5.pdf]

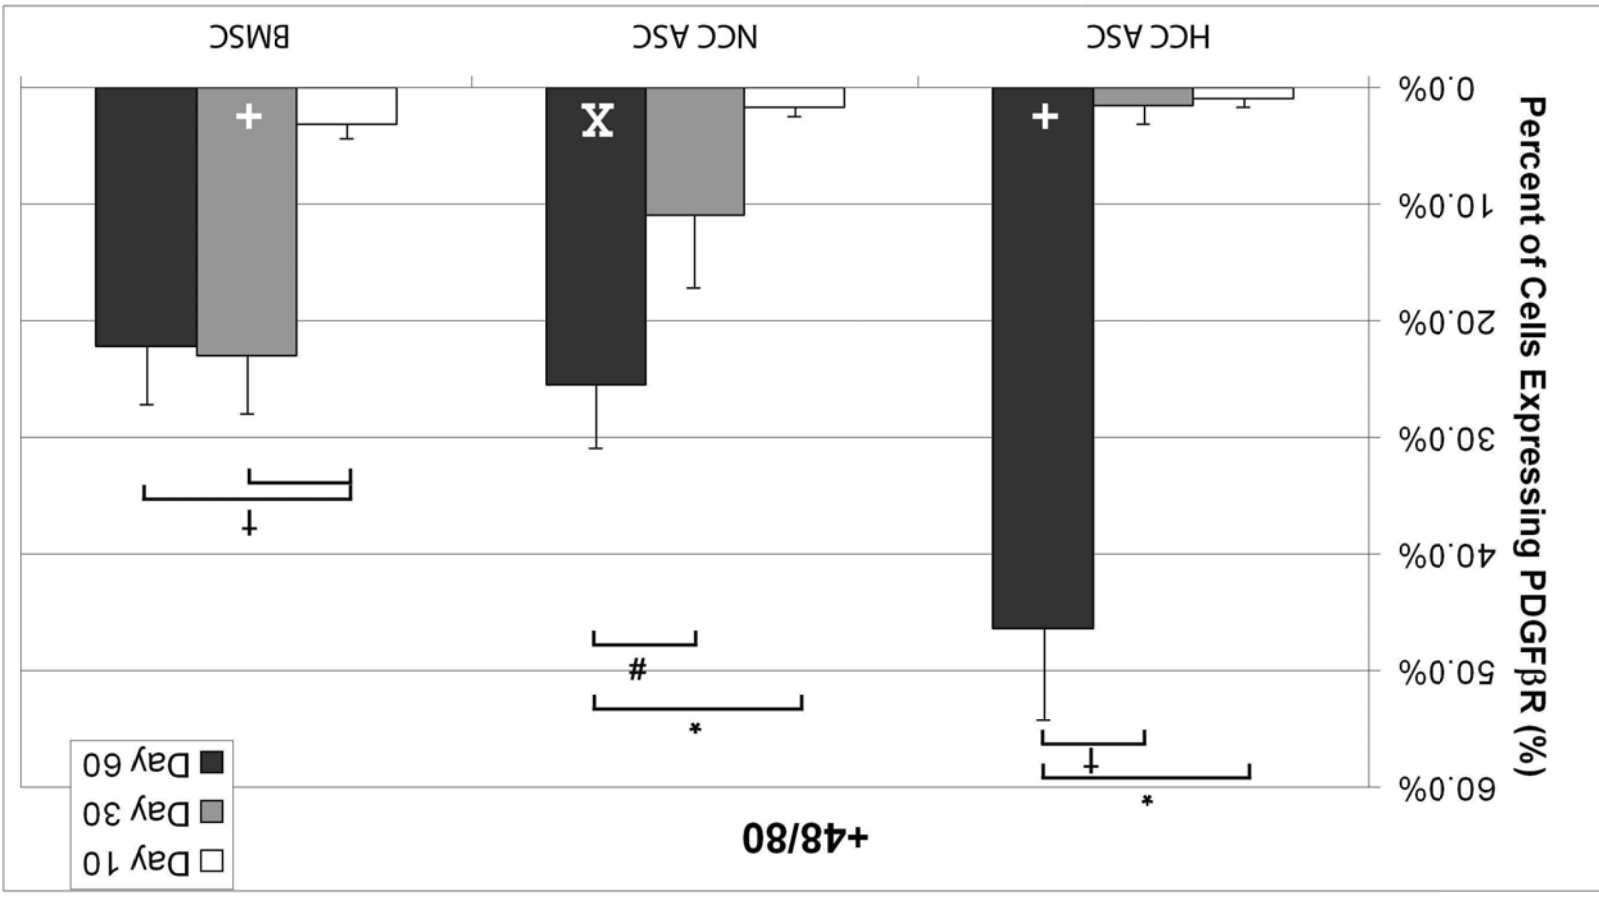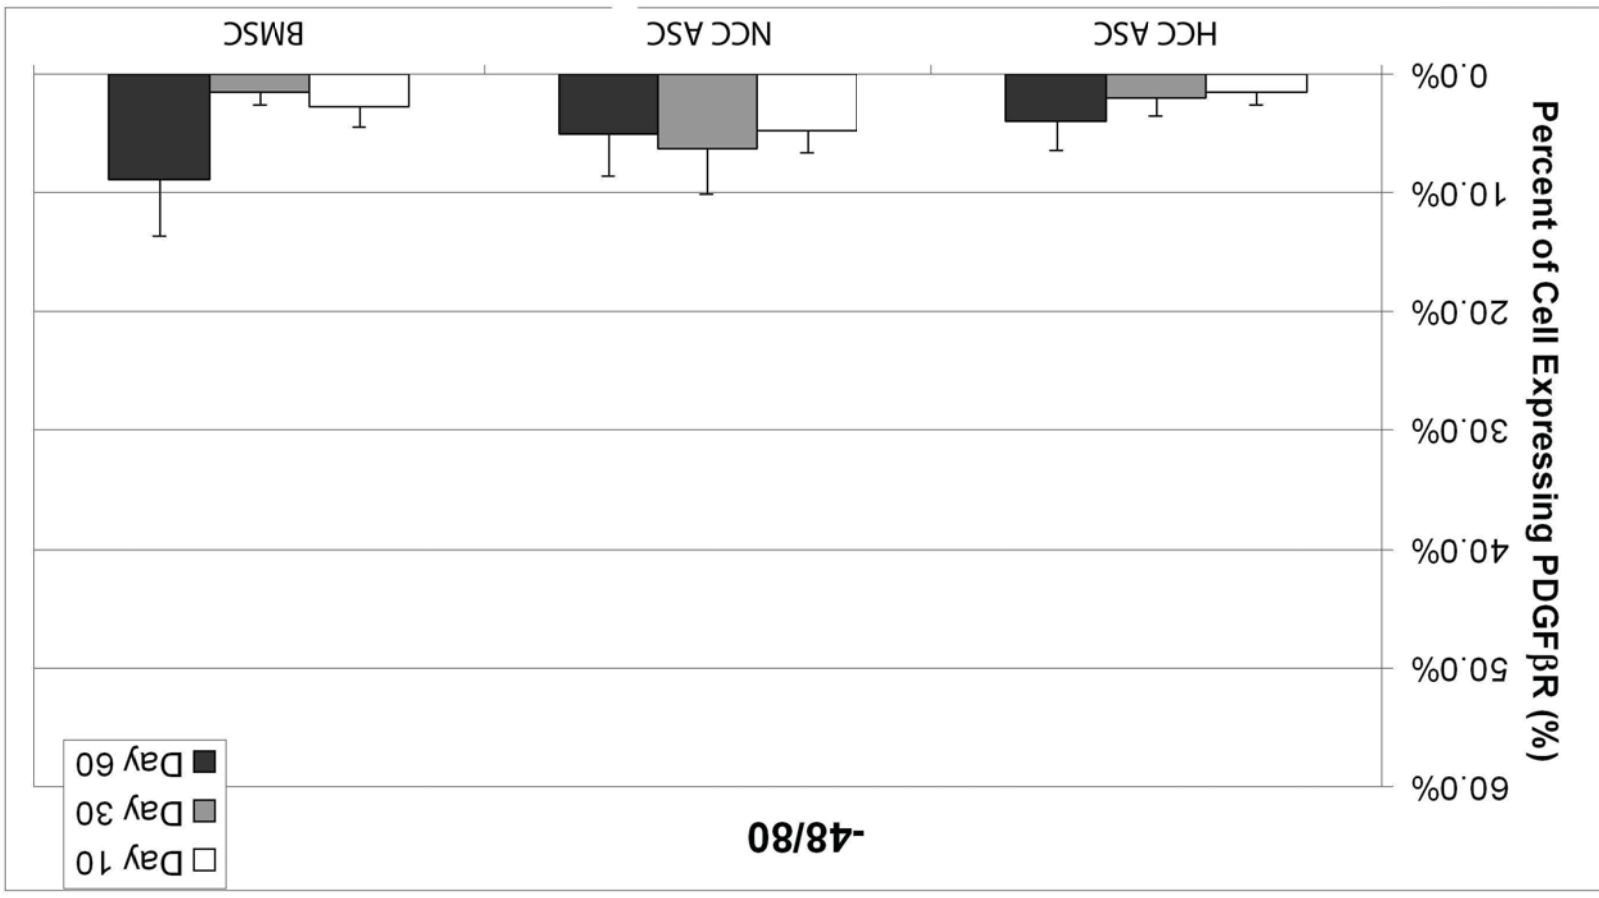

Supplement: supp_00460.2010_figS6.pdf [file supp_00460.2010_figS6.pdf]
